# Supplementary figures and images for: Environmental and Sensor Integration Influences on Temperature Measurements by Rotary-Wing Unmanned Aircraft Systems
Source: MDPI journal article supplement (doi:10.3390/s19061470), 2019-03-26

Flight 2 - Wind Estimator Off

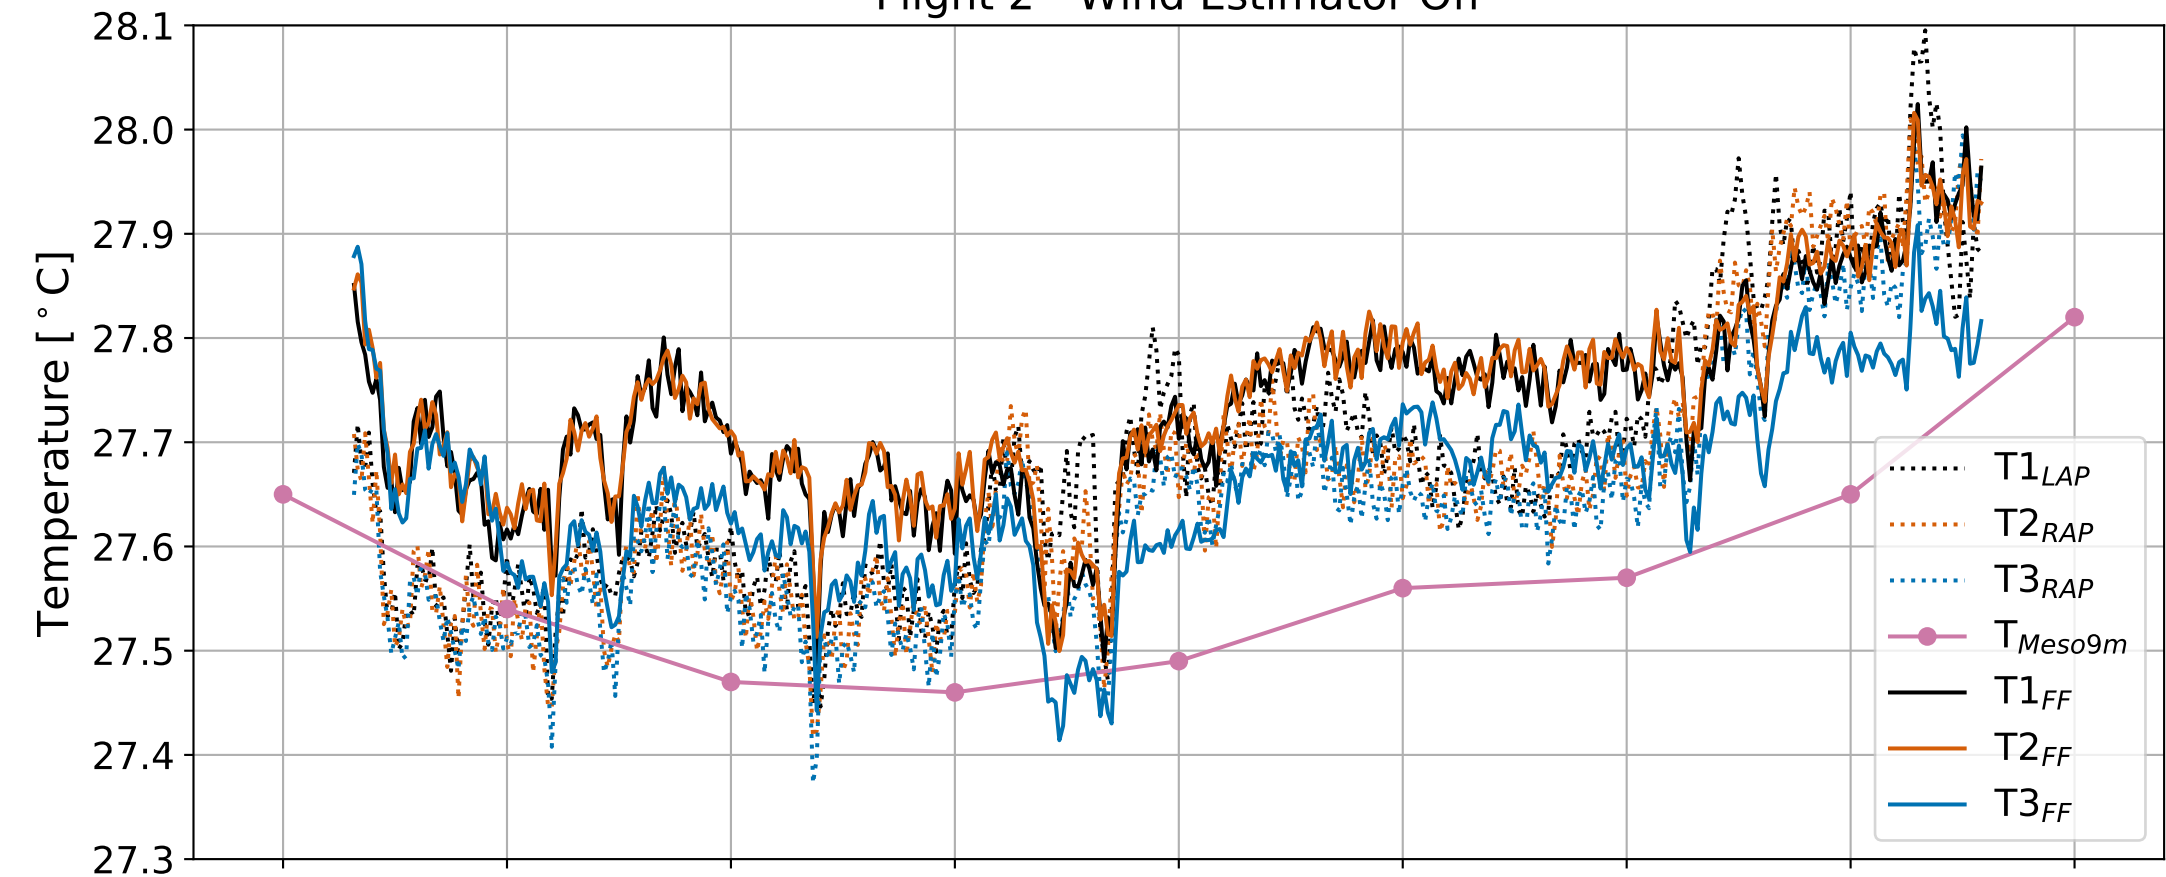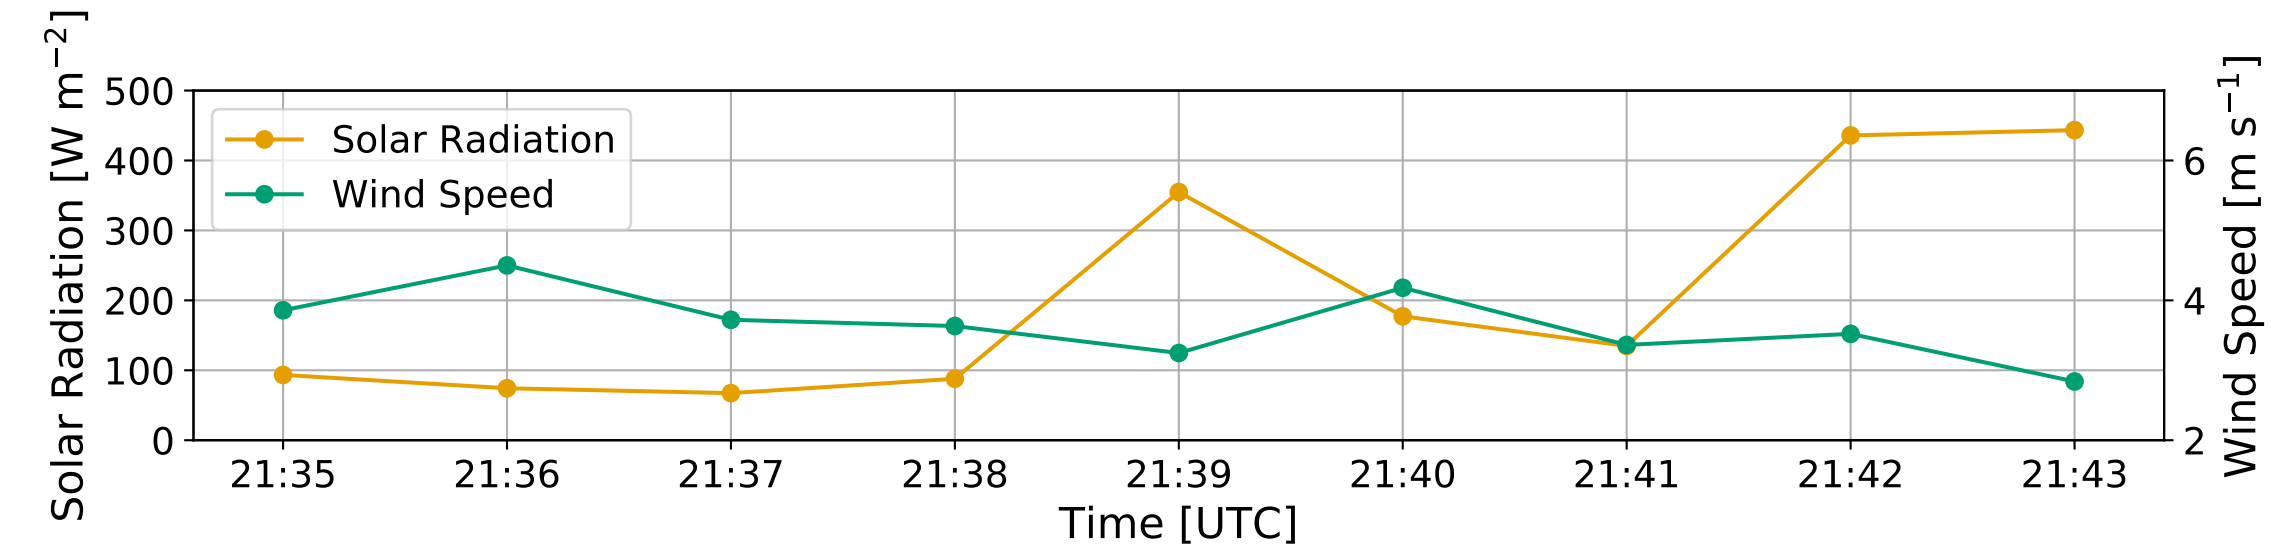

Supplement: s1 [file s1]

# Flight 3 - Wind Estimator On

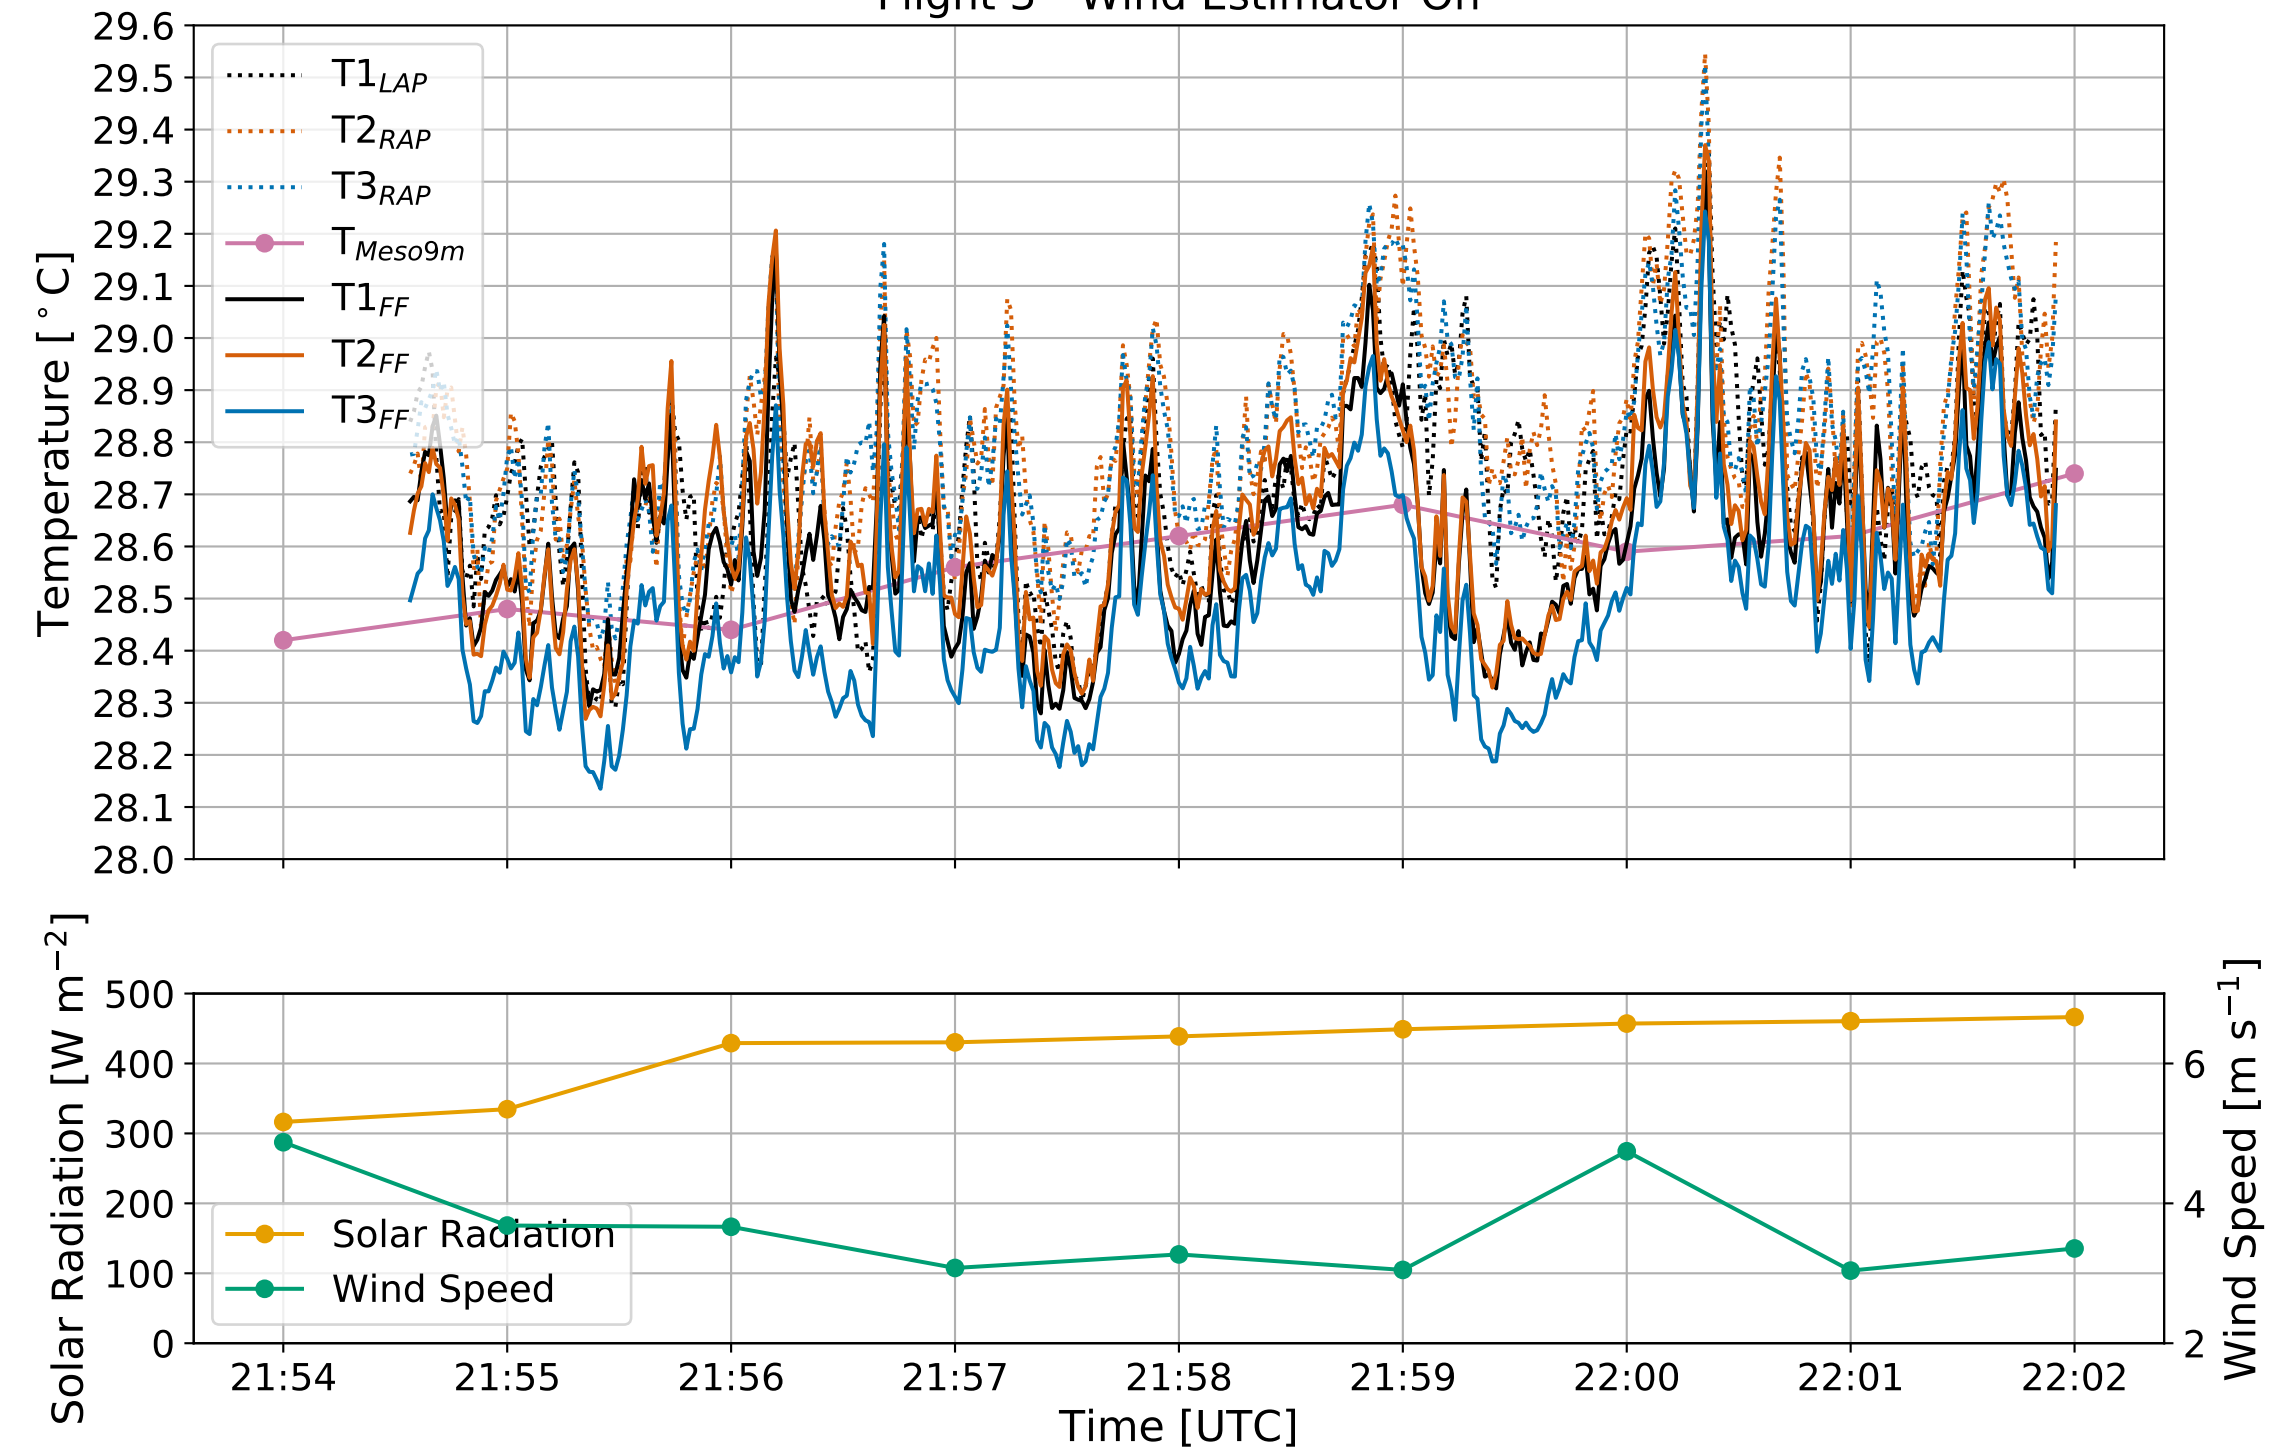

Supplement: s1 [file s1]
